# Supplementary material for: Matrix-molecule induced chiral enhancement effect of binary supramolecular liquid crystals
Source: Royal Society of Chemistry journal article supplement (doi:10.1039/b710701c), 2007-01-01
Supplement: b710701c.pdf [file b710701c.pdf]

# Supporting Information for Matrix-molecule Induced Chiral Enhancement Effect of Binary Supramolecular Liquid Crystals

Xiao-Jing Ma,<sup>a</sup> Yong-Tao Shen,<sup>b</sup> Ke Deng,<sup>a</sup> Hong Tang,<sup>c</sup> Sheng-bin Lei,<sup>a</sup> Chen Wang,<sup>\*a</sup>  
Yan-Lian Yang,<sup>\*a</sup> and Xi-Zeng Feng<sup>\*b</sup>

## Structural confirmation of C4 molecules

Confirmation of the structure of products was obtained by <sup>1</sup>H NMR spectra recorded on a Varian Unity plus-400 spectrometer in CDCl<sub>3</sub> solutions, and the chemical shifts are referenced to the internal tetramethylsilane peak. Mass spectra were obtained with Finnigan LCQ Advantage. The purity of the products was checked by elemental analysis with Elementar vario EL elemental analyzer (Elementar, Germany). Yield 69%; mp 178°C. <sup>1</sup>H NMR (400 MHz, CDCl<sub>3</sub>, TMS): δ=0.5–2.35 (m, 43H), 2.62 (t, 2H), 2.69 (t, 2H), 4.63 (m, 1H), 5.38 (d, 1H). MS (ESI): calculated for C<sub>31</sub>H<sub>50</sub>O<sub>4</sub>: 2M-H<sup>+</sup>, 972.46; found: m/z 971.55 (2M-H<sup>+</sup>). Elemental analysis (%): calculated for C<sub>31</sub>H<sub>50</sub>O<sub>4</sub>: C 76.50, H 10.35. found: C 76.31, H 10.27.

<sup>a</sup> National Center for Nanoscience and Technology, Beijing 100080, P. R. China. Tel: 86 10 62652700; Fax: 86 10 62650450; E-mail: wangch@nanoctr.cn; yangyl@nanoctr.cn

<sup>b</sup> College of Life Science, Nankai University, Tianjin, 300071, P. R. China. Tel / Fax: 86 22 23507022; E-mail: xzfeng@nankai.edu.cn

<sup>c</sup> Department of Chemistry, Tsinghua University, Beijing, 100084, P. R. China

†Electronic Supplementary Information (ESI) available: [structural characterization of C4 molecules]. See <http://dx.doi.org/10.1039/b000000x/>
